# Supplementary material for: Message Framing Effects on Individuals' Social Distancing and Helping Behavior During the COVID-19 Pandemic
Source: PubMed Central journal article supplement (PMC8019916; doi:10.3389/fpsyg.2021.579164), 2021-03-22
Supplement: Data_Sheet_1.pdf [file Data_Sheet_1.pdf]

APPENDIX

Study 1 Stimuli

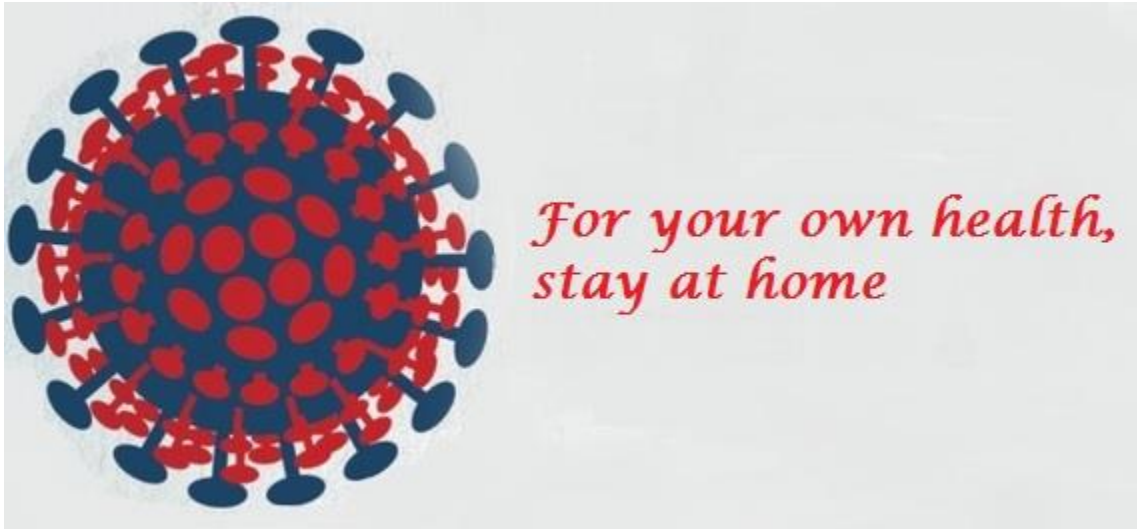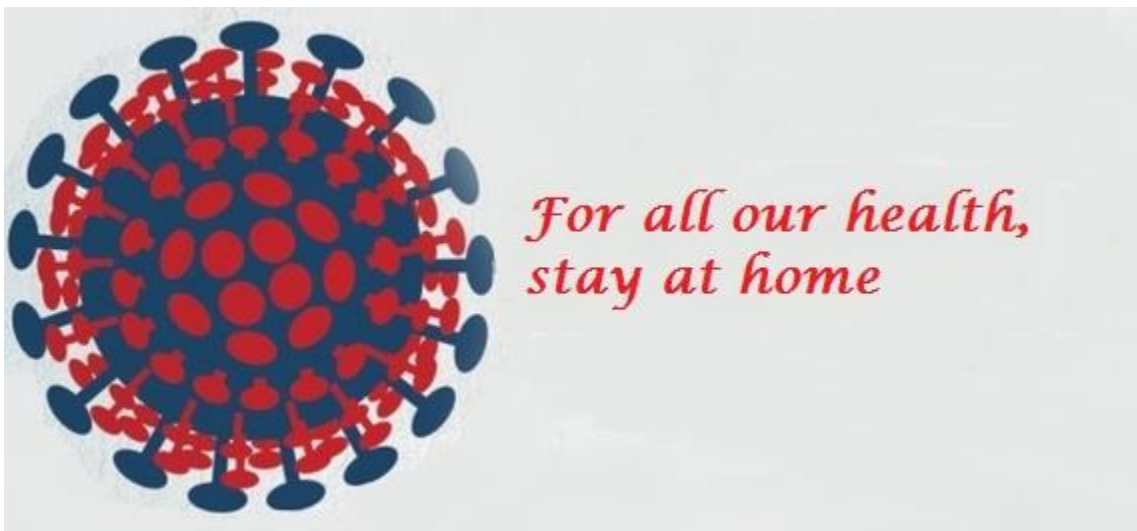

Study 2 Stimuli

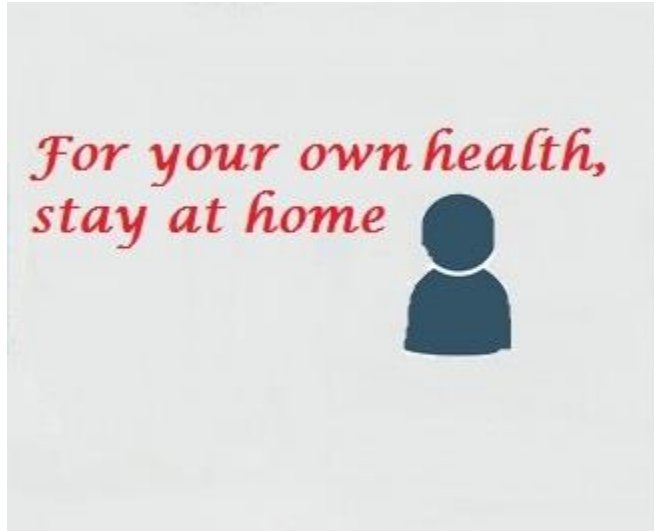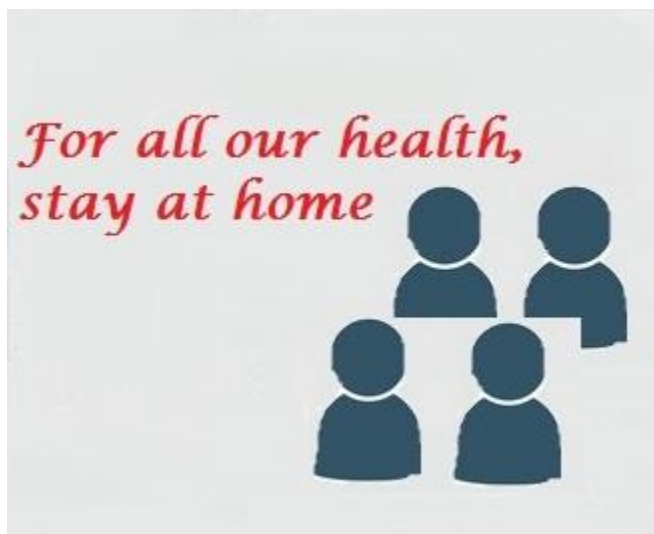

Study 3 Stimuli

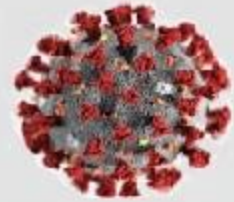

*For your own health,  
keep your physical distance with others!*

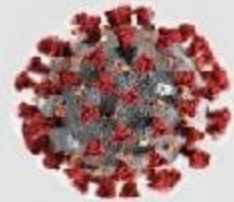

*For all our health,  
keep your physical distance with others!*
